# Supplementary material
Source: PubMed Central journal article supplement (PMC4980159)
Supplement: NIHMS806715-supplement-Supplemental.pdf [file NIHMS806715-supplement-Supplemental.pdf]

**FIGURE S1**

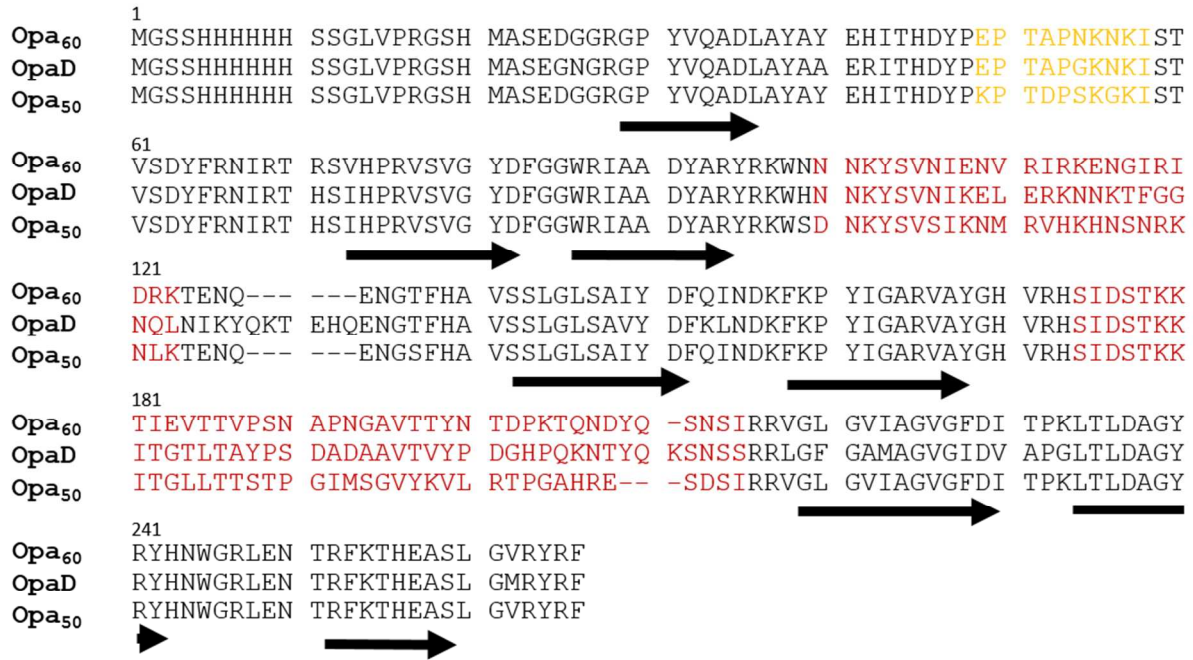

Figure S1. Sequence alignment of Opa<sub>60</sub> from Gc strain MS11, OpaD from Gc strain FA1090, and Opa<sub>50</sub> from Gc strain MS11. Semivariable regions are highlighted in yellow and hypervariable regions are highlighted in red. Black arrows indicate β-strands which form the membrane spanning barrel.

**FIGURE S2**

```

          40          50          60          70          80          90
CEACAM1  QLTTESMPFNVAEGKEVLLLVHNLPPQQLFGYSWYKGERVDGNRQIVGYAIGT-QQATPGP
CEACAM5  KLTIEST.FNV....E....VH.LPQHLEFG.S.Y..ERVDGNRQ.I..VIGT-.QAT..P
CEACAM3  KLTIESM.LSV....E....VH.LPQHLEFG.S.Y..ERVDGNSL.V..VIGT-.QAT..A
CEACAM6  KLTIEST.FNV....E....AH.LPQNRIG.S.Y..ERVDGNSL.V..VIGT-.QAT..P
CEACAM8  QLTIEAV.SNA....E....VH.LPQDPRG.N.Y..ETVDANRR.I..VISN-.QIT..P
CEACAM7  QTNIDVV.FNV....E....VH.ESQONLYG.N.Y..ERVHANYR.I..VKNIS.ENA..P
CEACAM4  QFTIEAL.SSA....D....AC.ISETIQA.Y.H..KTAEGSPL.A..ITDI-.ANI..A
          100         110         120         130         140
CEACAM1  ANSGRETIYPNASLLIQNVVTQNNTGFTLQVIKSDLVNEEAATGQFHVYP
CEACAM5  .YSG..II.P.AS..IQ.IIQN.T.F...HV.KSDLVNEEA.G.FR.YP
CEACAM3  .YSG..TI.T.AS..IQ.VTQN.I.F...QV.KSDLVNEEA.G.FH.YQ
CEACAM6  .YSG..TI.P.AS..IQ.VTQN.T.F...QV.KSDLVNEEA.G.FH.YP
CEACAM8  .YSN..TI.P.AS..MR.VTRN.T.S...QV.KLNLMSSEEV.G.FS.HP
CEACAM7  .HNG..TI.P.GT..IQ.VTHN.A.F...HV.KENLVNEEV.R.FY.FS
CEACAM4  .YSG..TV.P.GS..FQ.ITLE.A.S...RT.NASYDSDQA.G.LH.HQ
```

Figure S2. Sequence alignment of human NCCMs 1, 3, 4, 5, 6, 7, and 8. Essential residues for binding all Opa proteins are highlighted with red boxes and residues that are important to some Opa protein interactions with orange boxes (Figure 1A and 5). Residue numbering corresponds to CEACAM1 sequence, UniProt ID P13688-1.

**FIGURE S3**

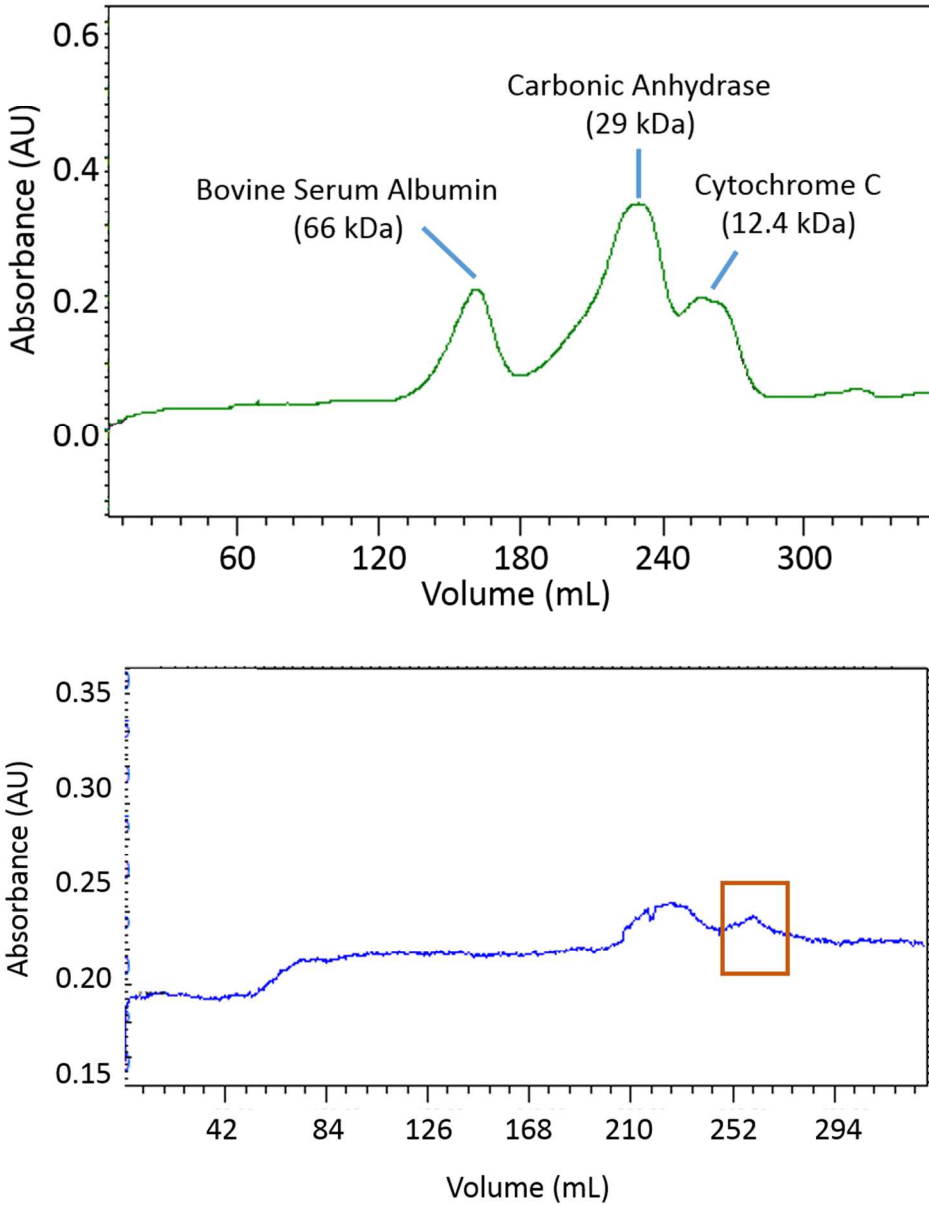

Figure S3. SEC chromatogram of molecular weight standards (top) and NCCM1 (bottom). Following GST tag cleavage, the NCCM1 was purified using SEC. Species were present with molecular weights corresponding to ~25 kDa (approximate MW of GST, TEV, and NCCM dimer), and ~12 kDa (approximate MW of NCCM monomer). A second passage through the SEC column was conducted immediately following (bottom), and fractions containing the monomeric NCCM (MW ~ 12 kDa) as assessed by SDS-PAGE were pooled and concentrated (orange box). Absorbance is at 280 nm.

**FIGURE S4**

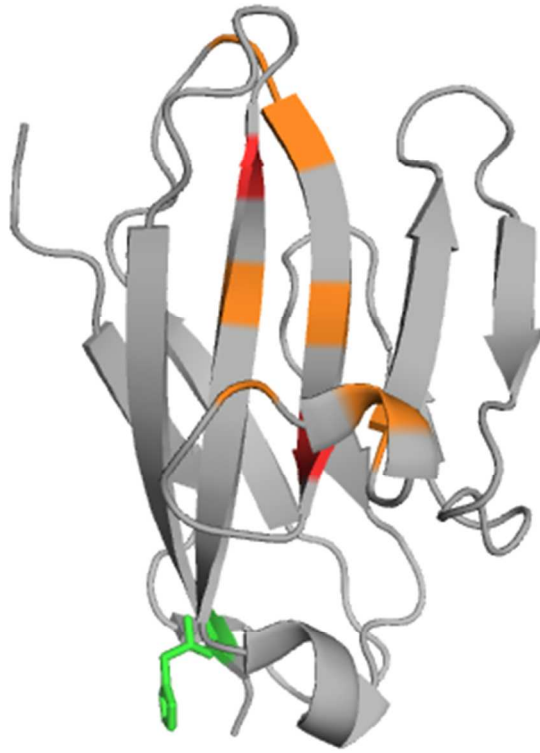

Figure S4. Ribbon representation of NCCM1 H139. The cysteine mutant (H139C), is located on the opposite side of the Opa-binding face. Opa-binding residues are colored as in Figure S2, H139 is colored green.

## FIGURE S5

A

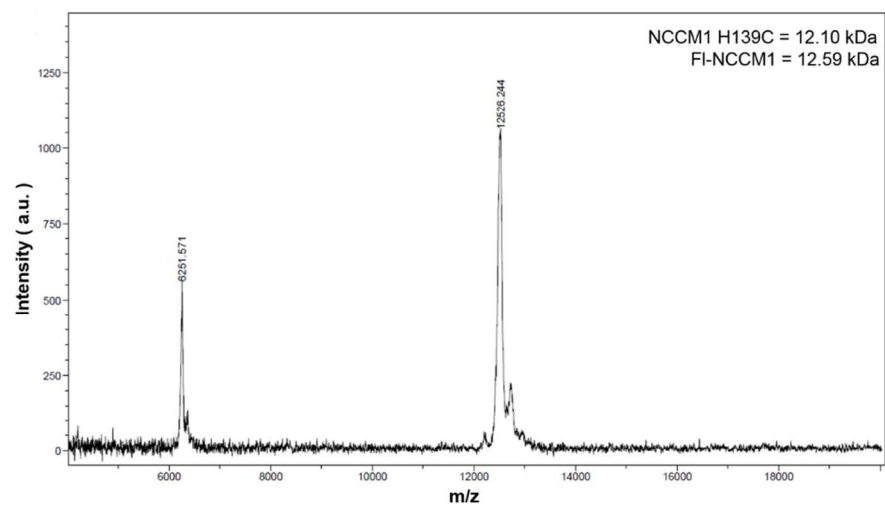

B

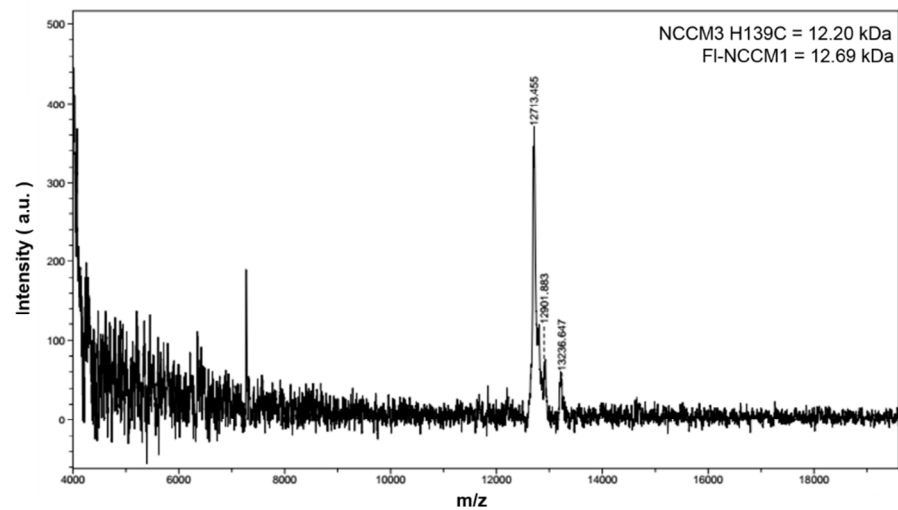

Figure S5. MALDI spectra of fluorescently labeled (FI-) NCCM1 (A) and NCCM3 (B). These spectra indicate that there is >95 % labeling efficiency of the AMS fluorophore (MW = 536.4 Da) with both NCCM1 and NCCM3.

**FIGURE S6**

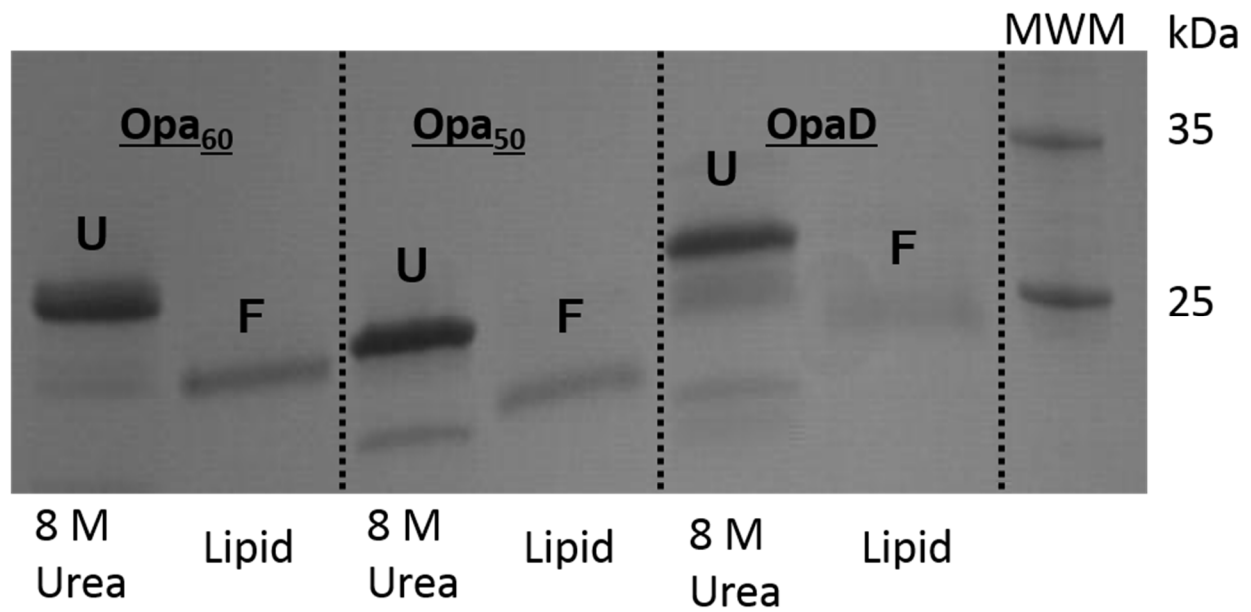

Figure S6. SDS-PAGE of Opa proteins. Folded Opa proteins (lanes labeled lipid) migrate at an apparent lower molecular weight than unfolded Opa proteins (8 M Urea) allowing folding to be assessed using SDS-PAGE. Fully folded samples were used for all experiments in this manuscript.

**FIGURE S7**

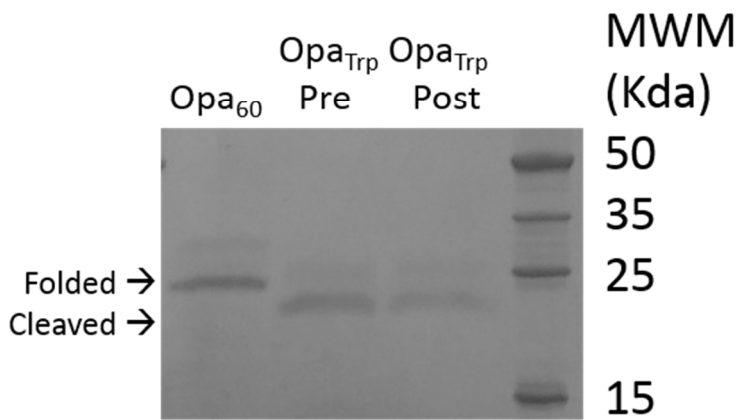

Figure S7. SDS-PAGE of trypsin cleavage of Opa<sub>60</sub> in liposomes. Lane 1 contains folded Opa<sub>60</sub> protein in liposomes, before the addition of trypsin (Opa<sub>60</sub>). Lane 2 is the sample after the addition of trypsin and incubation (~ 4 h), before the trypsin was removed (Opa<sub>Trp</sub> Pre). Lane 3 contains the flow through after passing over the benzamidine column (Opa<sub>Trp</sub> Post) and lane 4 contains the molecular weight marker (MWM).

**FIGURE S8**

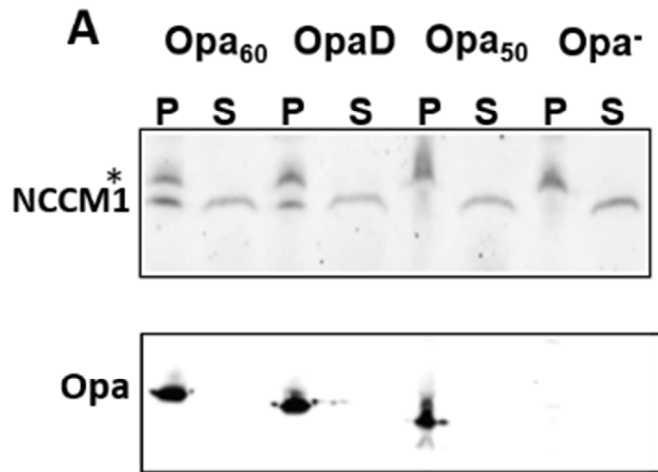

Figure S8. Immunoblot of pull-down assay using Opa expressing Gc and NCCM1 that has been cleaved and purified from the GST tag. Bacteria expressing OpaD, Opa<sub>50</sub>, or Opa<sub>60</sub>, or Opa<sup>-</sup> Gc, were incubated with NCCM1 (3 mg/mL), and samples were centrifuged for pellet (P) and supernatant (S) immunoblot assessment. Opa<sub>60</sub> and OpaD Gc interacted with cleaved NCCM1 similarly to GST-NCCM1 (compare to Figure 2) indicating the GST tag does not interfere with NCCM binding to Opa proteins. There is less GST-NCCM1 (Figure 2) present in the supernatant samples compared to the cleaved NCCM1, which indicates there may be some aggregation of the cleaved NCCM1. Folded Opa proteins migrate at a lower apparent molecular weight than unfolded Opa proteins. As such, the two bands correspond to folded (lower band) and unfolded (upper band) protein in the Opa immunoblots. \*Higher molecular weight bands in the Gc pellet samples of the CEACAM blots indicate nonspecific CEACAM antibody reactivity with antigens on the surface of Gc



FIGURE S9

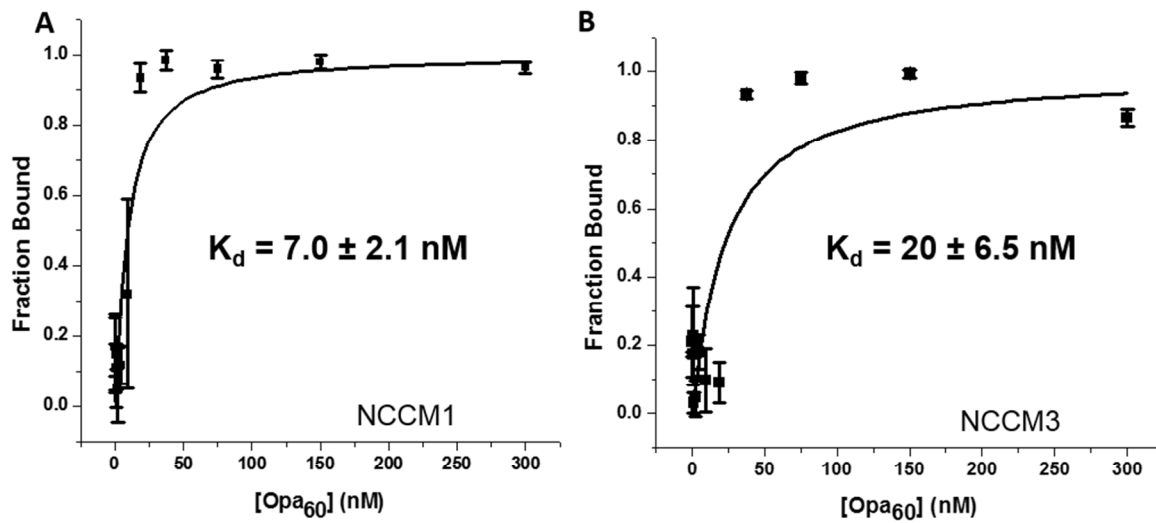

Figure S9. Competition FP assays with Opa<sub>60</sub>. FP experiments were carried out as previously described with Opa<sub>60</sub> proteoliposomes, incorporating half fl-labeled and half unlabeled NCCM1 (A) or NCCM3 (B). The total [NCCM] remained 5 nM. In both cases, the K<sub>d</sub> values approximately doubled, indicating that the interaction is specific.
